# Supplementary material
Source: PubMed Central journal article supplement (PMC1689825)
Supplement: 10331289s01.pdf [file 10331289s01.pdf]

This is an appendix to the paper by Deaner & Nunn 1999 How quickly do brains catch up with bodies? A comparative method for detecting evolutionary lag. *Proc. R. Soc. Lond. B* 266, 687–694.

Electronic appendices are refereed with the paper. However, no attempt has been made to impose a uniform editorial style on the electronic appendix.

## Appendix A. Main data used in analyses

(CBOM = contrast in body mass; CBRM = contrast in brain mass; CE = contrast in ecology; d = diet; a = activity timing; o = other; CGSZ = contrast in group size; DD = divergence date; 1 = Purvis 1995; 2 = Groves 1993; 3 = Barroso et al. 1997; 4 = Delson 1994; \* indicates date was spaced evenly along branch length. See text for details on species pairings, contrast calculations, date spacing, and definitions.)

| Pairwise Contrast                                               | CBOM  | CBRM   | CE | CGSZ   | DD   | Ref |
|-----------------------------------------------------------------|-------|--------|----|--------|------|-----|
| Females                                                         |       |        |    |        |      |     |
| <u>Colobus polykomos</u> vs. <u>C. guereza</u>                  | 0.029 | 0.053  | -  | 0.046  | 0.1  | 1   |
| <u>Hylobates lar</u> vs. <u>H. agilis</u>                       | 0.003 | 0.041  | -  | -0.033 | 0.5  | 2   |
| <u>Papio anubis</u> vs. <u>P. ursinus</u>                       | 0.163 | 0.049  | -  | 0.142  | 0.6  | 1   |
| <u>Ateles fusiceps</u> vs. <u>A. geoffroyi</u>                  | 0.012 | 0.024  | -  | -      | 0.7  | 3   |
| <u>Macaca mulatta</u> vs. <u>M. fascicularis</u>                | 0.109 | 0.153  | -  | 0.151  | 1.6  | 1   |
| <u>Otolemur crassicaudatus</u> vs. <u>Galagoides demidoff</u>   | 0.879 | 0.463  | d  | 0      | 1.9  | 1   |
| <u>Cercopithecus lhoesti</u> vs. <u>C. mona</u>                 | 0.274 | 0.134  | -  | -0.019 | 2.1  | 1*  |
| <u>Presbytis entellus</u> vs. <u>Nasalis larvatus</u>           | 0.085 | 0.070  | -  | 0.426  | 3.0  | 4   |
| <u>Callithrix jacchus</u> vs. <u>Cebuella pygmaea</u>           | 0.347 | 0.277  | -  | 0.016  | 3.9  | 3   |
| <u>Cercopithecus mitis</u> vs. <u>C. ascanius</u>               | 0.241 | -0.039 | -  | -0.109 | 3.4  | 1*  |
| <u>Erythrocebus patas</u> vs. <u>Cercopithecus aethiops</u>     | 0.285 | 0.228  | -  | 0.065  | 3.5  | 1*  |
| <u>Hylobates syndactylus</u> vs. <u>H. moloch</u>               | 0.184 | 0.146  | d  | -      | 6.3  | 1   |
| <u>Mandrillus sphinx</u> vs. <u>Cercocebus albigena</u>         | 0.208 | 0.278  | -  | 0.734  | 6.7  | 1   |
| <u>Homo sapiens</u> vs. <u>Pan troglodytes</u>                  | 0.130 | 0.531  | o  | -      | 7.0  | 1   |
| <u>Macaca nemestrina</u> vs. <u>Allenopithecus nigroviridis</u> | 0.201 | 0.185  | -  | -0.017 | 9.6  | 1   |
| <u>Cheirogaleus major</u> vs. <u>Microcebus murinus</u>         | 0.964 | 0.597  | -  | -0.398 | 10.2 | 1   |
| <u>Nycticebus coucang</u> vs. <u>Loris tardigradus</u>          | 0.387 | 0.183  | d  | -      | 12.0 | 1   |
| <u>Aloutta seniculus</u> vs. <u>Lagothrix lagotricha</u>        | 0.137 | -0.270 | d  | -0.615 | 13.7 | 3   |
| <u>Daubentonia madagascarensis</u> vs. <u>Avahi laniger</u>     | 0.283 | 0.635  | d  | -0.222 | 14.0 | 1   |
| <u>Eulemur mongoz</u> vs. <u>Lemur catta</u>                    | 0.058 | 0.036  | -  | -0.716 | 14.0 | 1   |
| <u>Gorilla gorilla</u> vs. <u>Pongo pygmaeus</u>                | 0.297 | 0.155  | d  | 1.023  | 14.5 | 1   |
| <u>Cebus capucinus</u> vs. <u>C. apella</u>                     | 0.099 | 0.011  | -  | 0.041  | 17.9 | 1   |
| <u>Varecia variegata</u> vs. <u>Lepilemur mustelinus</u>        | 0.410 | 0.592  | a  | 0.653  | 20.0 | 1   |
| <u>Aotus trivirgatus</u> vs. <u>Callicebus moloch</u>           | 0.064 | 0.095  | a  | 0      | 21.3 | 3   |
| <u>Colobus badius</u> vs. <u>Leontopithecus rosalia</u>         | 1.325 | 0.804  | d  | 0.827  | 39.9 | 1   |
| <u>Tarsius bancanus</u> vs. <u>T. syrichta</u>                  | 0.093 | -0.125 | -  | -0.176 | -    | -   |
| <u>Indri indri</u> vs. <u>Propithecus verreauxi</u>             | 0.293 | 0.156  | d  | -0.152 | -    | -   |
| <u>Saguinus oedipus</u> vs. <u>S. midas</u>                     | 0.109 | -0.019 | -  | 0.052  | -    | -   |
| <u>Saimiri oerstedii</u> vs. <u>S. sciureus</u>                 | 0.300 | 0.060  | d  | -0.144 | -    | -   |
| <u>Cercocebus galeritus</u> vs. <u>C. torquatus</u>             | 0.049 | -0.015 | -  | -0.156 | -    | -   |
| <u>Presbytis cristata</u> vs. <u>P. obscura</u>                 | 0.233 | 0.054  | -  | 0.173  | -    | -   |
| Males                                                           |       |        |    |        |      |     |
| <u>Hylobates agilis</u> vs. <u>H. lar</u>                       | 0.022 | -0.065 | -  | -0.033 | 0.5  | 2   |
| <u>Papio ursinus</u> vs. <u>P. cynocephalus</u>                 | 0.099 | 0.015  | -  | 0.083  | 0.6  | 1   |
| <u>Ateles fusiceps</u> vs. <u>A. geoffroyi</u>                  | 0.067 | 0.020  | -  | -      | 0.7  | 3*  |
| <u>Macaca mulatta</u> vs. <u>M. fascicularis</u>                | 0.164 | 0.137  | -  | 0.151  | 1.6  | 1   |
| <u>Otolemur crassicaudatus</u> vs. <u>Galagoides demidoff</u>   | 0.974 | 0.469  | d  | 0      | 1.9  | 1   |

|                                                            |       |        |     |        |      |    |
|------------------------------------------------------------|-------|--------|-----|--------|------|----|
| <u>Macaca nemestrina</u> vs. <u>M. sinica</u>              | 0.097 | 0.110  | -   | 0.184  | 2.8  | 1  |
| <u>Cercopithecus lhoesti</u> vs. <u>C. aethiops</u>        | 0.321 | 0.113  | -   | -0.371 | 3.0  | 1  |
| <u>Nasalis larvatus</u> vs. <u>Presbytis entellus</u>      | 0.216 | -0.018 | -   | -0.426 | 3.0  | 4  |
| <u>Callithrix jacchus</u> vs. <u>Cebuella pygmaea</u>      | 0.449 | 0.277  | -   | 0.016  | 3.9  | 3  |
| <u>Cercopithecus mitis</u> vs. <u>C. ascanius</u>          | 0.246 | 0.064  | -   | -0.109 | 3.4  | 1* |
| <u>Hylobates syndactylus</u> vs. <u>H. moloch</u>          | 0.347 | 0.148  | d   | -      | 6.3  | 1  |
| <u>Mandrillus sphinx</u> vs. <u>Cercocebus albigena</u>    | 0.511 | 0.199  | -   | 0.734  | 6.7  | 1  |
| <u>Homo sapiens</u> vs. <u>Pan troglodytes</u>             | 0.185 | 0.543  | o   | -      | 7.0  | 1  |
| <u>Papio hamadryas</u> vs. <u>Macaca nigra</u>             | 0.342 | 0.217  | d   | 0.266  | 9.3  | 1  |
| <u>Pygathrix nemaeus</u> vs. <u>Colobus badius</u>         | 0.207 | 0.026  | -   | -0.605 | 9.3  | 1  |
| <u>Cheirogaleus major</u> vs. <u>Microcebus murinus</u>    | 0.897 | 0.573  | -   | -0.398 | 10.2 | 1  |
| <u>Nycticebus coucang</u> vs. <u>Loris tardigradus</u>     | 0.467 | 0.257  | d   | -      | 12.0 | 1  |
| <u>Aloutta seniculus</u> vs. <u>Lagothrix lagothricha</u>  | 0.048 | -0.313 | d   | -0.615 | 13.7 | 3  |
| <u>Gorilla gorilla</u> vs. <u>Pongo pygmaeus</u>           | 0.209 | 0.076  | d   | 1.023  | 14.5 | 1  |
| <u>Cebus capucinus</u> vs. <u>C. apella</u>                | 0.145 | 0.024  | -   | 0.041  | 17.9 | 1  |
| <u>Lepilemur mustelinus</u> vs. <u>Avahi laniger</u>       | 0.035 | -0.133 | -   | -0.319 | 18.6 | 1  |
| <u>Aotus trivirgatus</u> vs. <u>Callicebus moloch</u>      | 0.118 | 0.005  | a   | 0      | 21.3 | 3  |
| <u>Pithecia monachus</u> vs. <u>Leontopithecus rosalia</u> | 0.511 | 0.418  | -   | -0.109 | 28.8 | 1  |
| <u>Varecia variegata</u> vs. <u>Perodicticus potto</u>     | 0.498 | 0.343  | a   | 0.732  | 39.6 | 1  |
| <u>Miopithecus talapoin</u> vs. <u>Tarsius bancanus</u>    | 1.026 | 1.034  | a d | 1.666  | 49.6 | 1  |
| <u>Indri indri</u> vs. <u>Propithecus verreauxi</u>        | 0.108 | 0.100  | d   | -0.166 | -    | -  |
| <u>Saguinus oedipus</u> vs. <u>S. midas</u>                | 0.140 | 0.010  | d   | 0.052  | -    | -  |
| <u>Saimiri oerstedii</u> vs. <u>S. sciureus</u>            | 0.226 | 0.058  | d   | -0.144 | -    | -  |
| <u>Cercocebus galeritus</u> vs. <u>C. torquatus</u>        | 0.246 | 0.052  | -   | -0.156 | -    | -  |
| <u>Eulemur macaco</u> vs. <u>E. fulvus</u>                 | 0.191 | 0.015  | -   | -0.066 | -    | -  |
| <u>Cercopithecus hamlyni</u> vs. <u>C. mona</u>            | 0.054 | 0.018  | -   | -0.057 | -    | -  |
| <u>Presbytis cristata</u> vs. <u>P. obscura</u>            | 0.166 | 0.059  | -   | 0.173  | -    | -  |
